# Supplementary material
Source: PubMed Central journal article supplement (PMC4919421)
Supplement: mmc1.pdf [file mmc1.pdf]

**Biophysical Journal, Volume 110**

**Supplemental Information**

**Studies on the X-Ray and Solution Structure of FeoB from *Escherichia coli* BL21**

**Gregor Hagelueken, Jan Hoffmann, Erik Schubert, Fraser G. Duthie, Nicole Florin, Lisa Konrad, Diana Imhof, Elmar Behrmann, Nina Morgner, and Olav Schiemann**

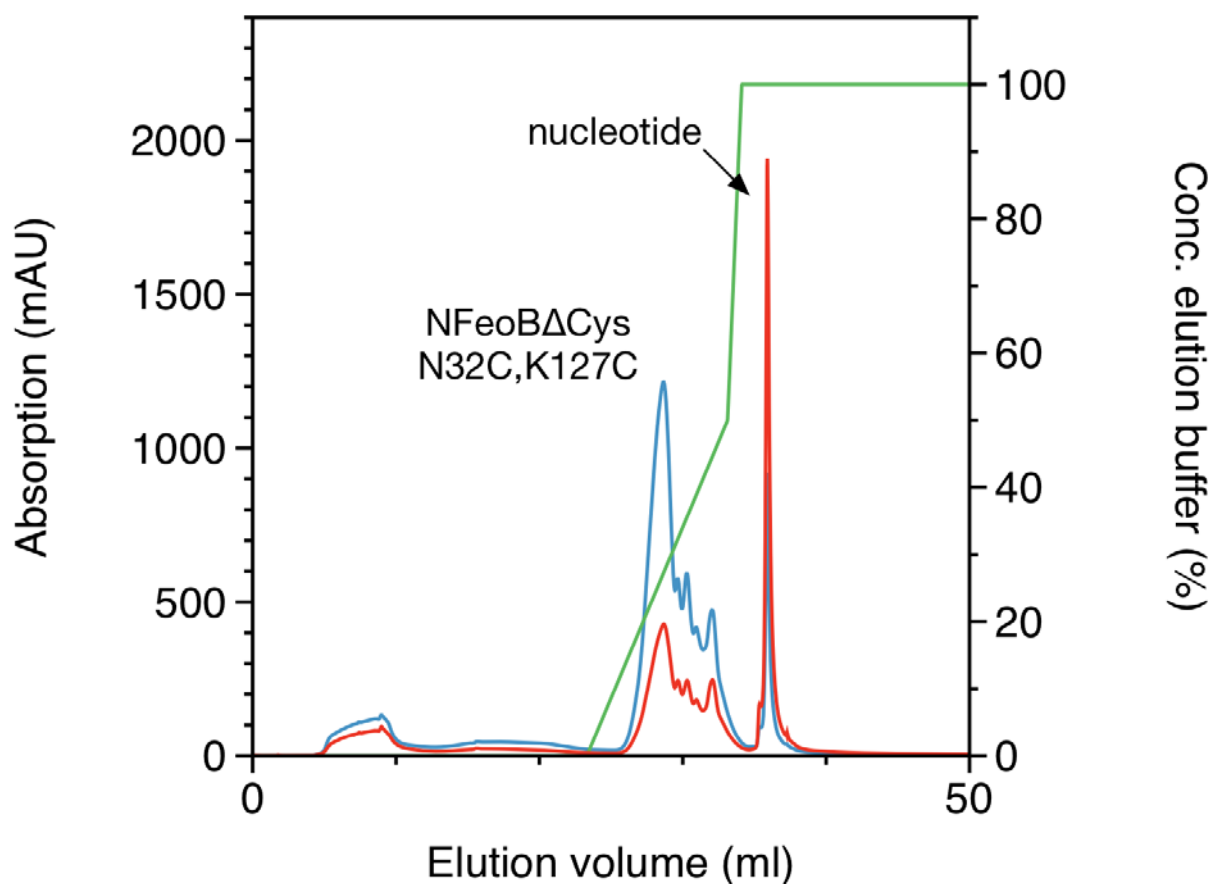

**Supplementary Figure 1:** Anion exchange chromatography of NFeoBΔCys N32C,K127C. The blue trace shows the absorption at 280 nm and the red trace the absorption at 260 nm. The green line shows the NaCl gradient. The elution buffer contained 1M NaCl, i.e. 100 % elution buffer corresponds to a NaCl concentration of 1M. It is clearly visible that the protein (high absorption at 280 nm) elutes at much lower NaCl concentrations than the copurified nucleotide (GTP or GDP, high absorption at 260 nm).

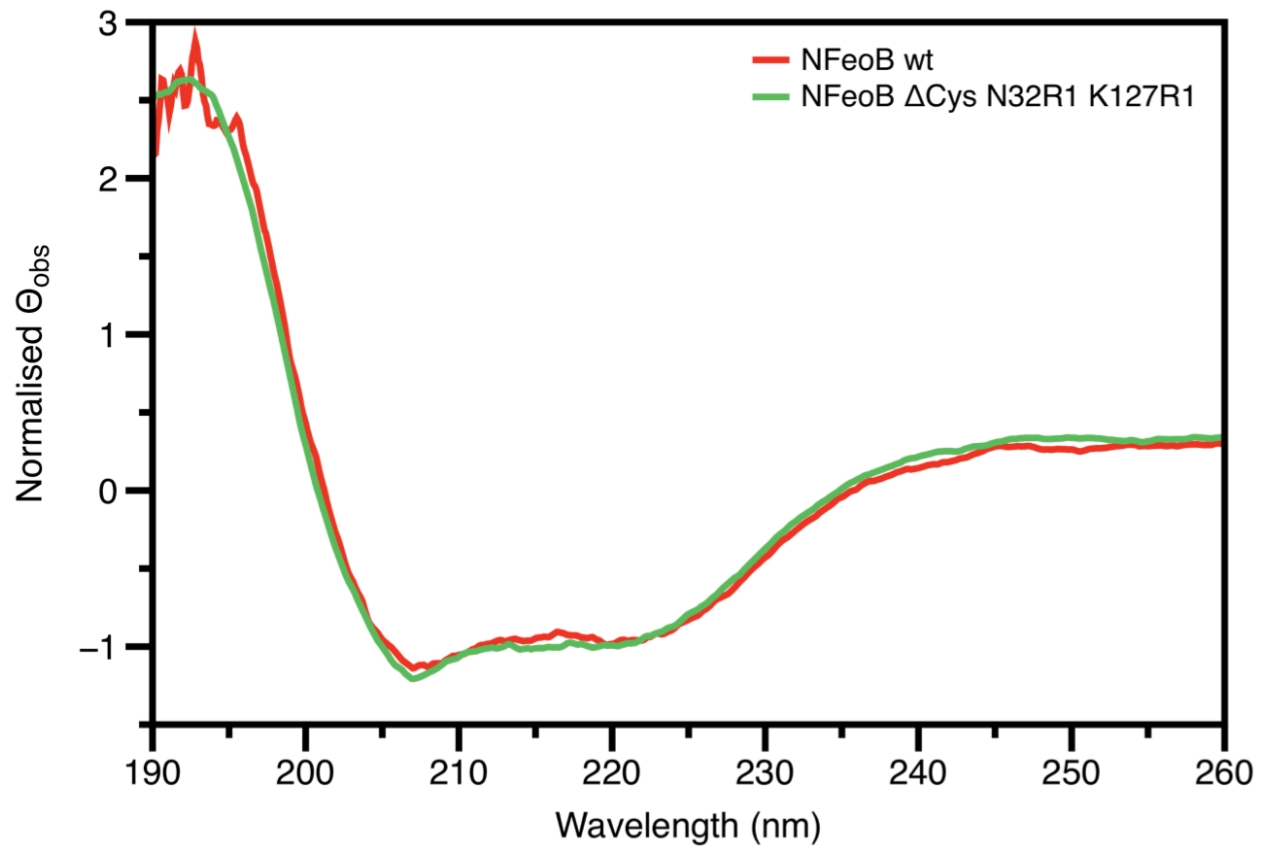

**Supplementary Figure 2:** Circular dichroism (CD) spectra of NFeoB wt (red) and R1 labelled NFeoB  $\Delta$ Cys N32R1 K127R1 (green).

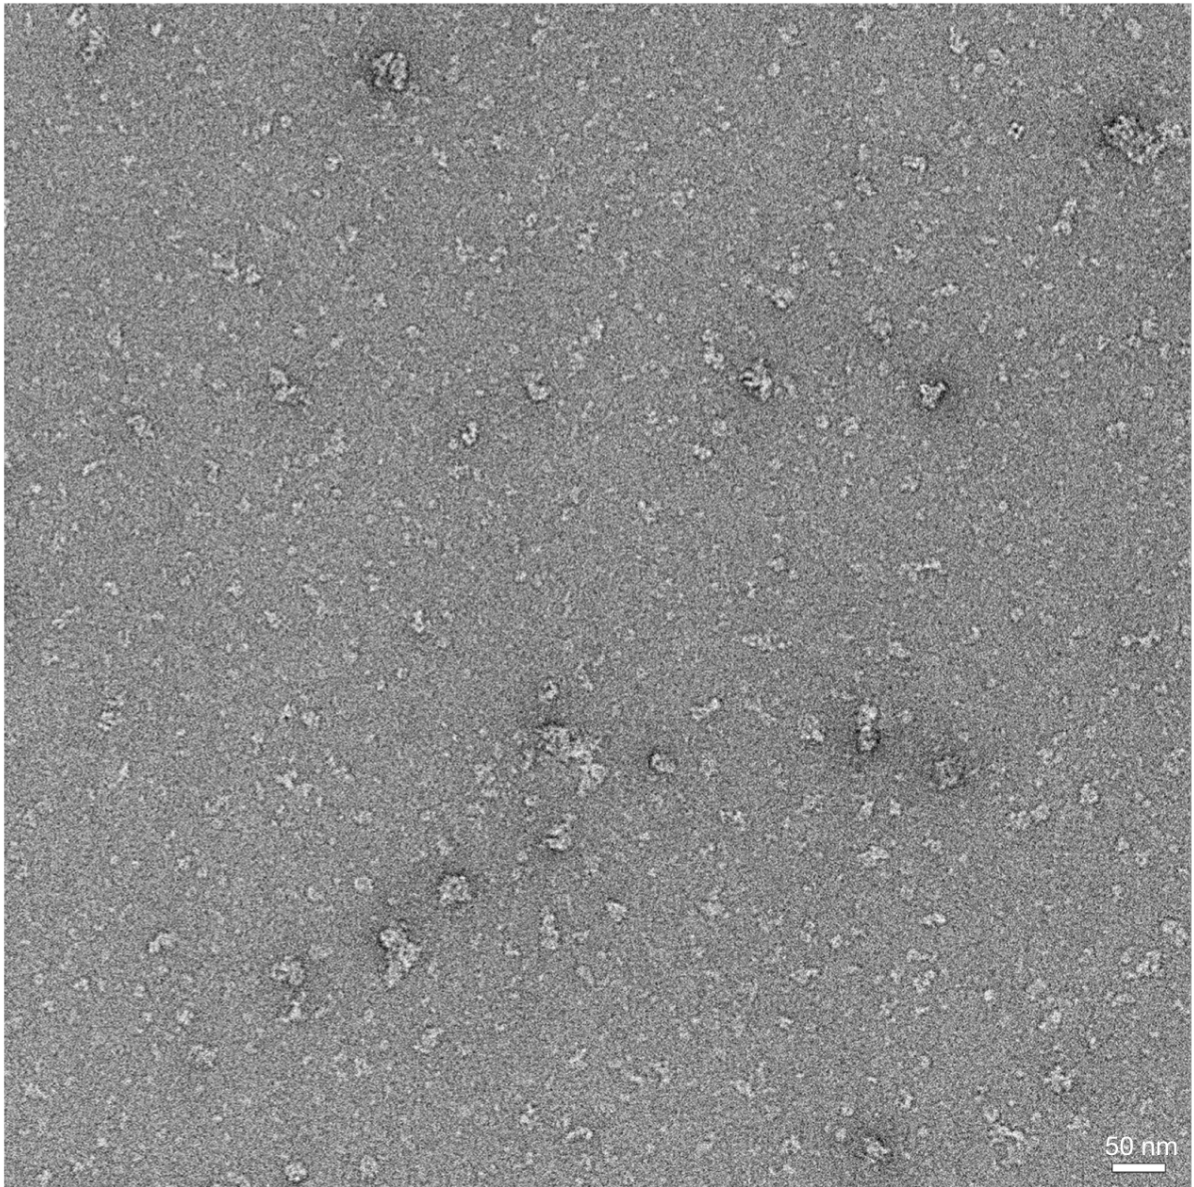

**Supplementary Figure 3:** Representative negative-stain EM micrograph of DDM solubilised full-length FeoB.

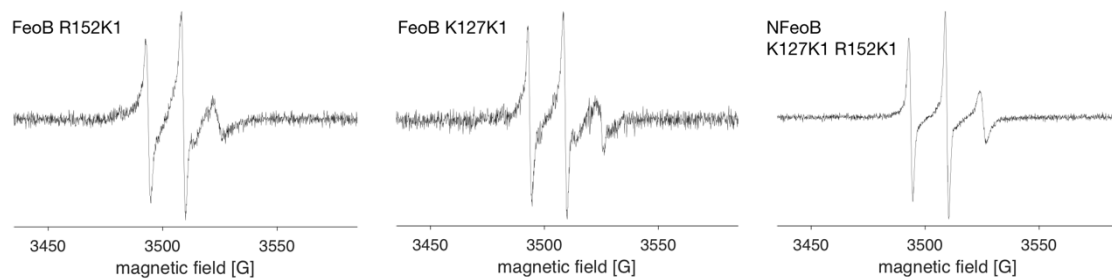

**Supplementary Figure 4:** Room temperature X-band *cw*-EPR spectra of K1 labelled PELDOR samples.
